# Supplementary material for: Susceptibility to SARS-CoV-2 and MERS-CoV in Beagle Dogs
Source: MDPI journal article supplement (doi:10.3390/ani13040624), 2023-02-10
Supplement: s1 [file s1]

| Body weight (Kg) |     |                       |      |      |      |      |      |      |
|------------------|-----|-----------------------|------|------|------|------|------|------|
| Group            | Dog | days-post-inoculation |      |      |      |      |      |      |
|                  |     | 0                     | 2    | 3    | 4    | 5    | 6    | 7    |
| SARS-CoV-2       | A   | 5.50                  | 5.30 | 5.80 | 5.50 | 5.60 | 6.10 | 6.20 |
|                  | B   | 6.40                  | 7.00 | 6.80 | 6.00 | 6.40 | 6.30 | 5.60 |
|                  | C   | 6.60                  | 6.40 | 6.30 | 6.80 | 7.30 | 6.70 | 6.90 |
| MERS-CoV         | A   | 7.30                  | 6.80 | 6.90 | 7.20 | 7.30 | 7.50 | 7.30 |
|                  | B   | 7.30                  | 6.80 | 7.10 | 6.90 | 7.00 | 7.10 | 7.30 |
|                  | C   | 6.80                  | 6.30 | 6.50 | 6.60 | 6.90 | 6.70 | 7.10 |
| Negative control |     | 8.50                  | 8.80 | 9.00 | 9.00 | 9.40 | 9.50 | 9.50 |

| Body temperatuer (°C) |     |                       |       |       |       |       |       |       |
|-----------------------|-----|-----------------------|-------|-------|-------|-------|-------|-------|
| Group                 | Dog | days-post-inoculation |       |       |       |       |       |       |
|                       |     | 0                     | 2     | 3     | 4     | 5     | 6     | 7     |
| SARS-CoV-2            | A   | 37.80                 | 37.40 | 38.50 | 38.90 | 39.30 | 39.00 | 39.30 |
|                       | B   | 38.20                 | 38.60 | 39.30 | 37.90 | 39.20 | 39.20 | 39.50 |
|                       | C   | 37.90                 | 37.70 | 38.50 | 38.50 | 38.80 | 38.40 | 38.50 |
| MERS-CoV              | A   | 37.80                 | 38.90 | 39.50 | 39.60 | 39.60 | 40.00 | 39.80 |
|                       | B   | 38.10                 | 39.00 | 39.70 | 39.90 | 39.70 | 39.80 | 39.50 |
|                       | C   | 37.90                 | 39.30 | 40.00 | 39.60 | 39.70 | 39.50 | 39.60 |
| Negative control      |     | 38.20                 | 37.80 | 38.30 | 37.90 | 38.00 | 38.30 | 38.40 |
