# Supplementary material for: Susceptibility to SARS-CoV-2 and MERS-CoV in Beagle Dogs
Source: MDPI journal article supplement (doi:10.3390/ani13040624), 2023-02-10
Supplement: s1 [file s1]

Blood biochemistry

| Group            | Dog | Parameter    | days-post-inoculation |      |     |      |     | Normal range |
|------------------|-----|--------------|-----------------------|------|-----|------|-----|--------------|
|                  |     |              | 0                     | 3    | 5   | 6    | 7   |              |
| SARS-CoV-2       | A   | ALT (U/L)    | 42                    | 66   | 50  | 47   | 53  | 10~100       |
|                  |     | ALB (g/dL)   | 3.4                   | 3.3  | 2.9 | 3.3  | 2.7 | 2.3~4.0      |
|                  |     | TBIL (mg/dL) | 0.1                   | 1.1  | 0.2 | 1.5  | 0.1 | 0~0.9        |
|                  |     | BUN (mg/dL)  | 9.82                  | 29   | 22  | 25   | 19  | 7~27         |
|                  |     | ALKP (U/L)   | 68                    | 101  | 115 | 90   | 96  | 23~212       |
|                  |     | LDH (U/L)    | 210                   | 859  | 607 | 1021 | 486 | 40~400       |
|                  |     | CREA (mg/dL) | 0.6                   | 0.5  | 0.4 | 0.4  | 0.4 | 0.5~1.8      |
|                  | B   | ALT (U/L)    | 75                    | 69   | 65  | 59   | 78  | 10~100       |
|                  |     | ALB (g/dL)   | 2.8                   | 3    | 2.8 | 2.9  | 2.8 | 2.3~4.0      |
|                  |     | TBIL (mg/dL) | 0.1                   | 0.1  | 0.1 | 0.1  | 0.1 | 0~0.9        |
|                  |     | BUN (mg/dL)  | 15                    | 22   | 19  | 14   | 16  | 7~27         |
|                  |     | ALKP (U/L)   | 95                    | 72   | 53  | 59   | 68  | 23~212       |
|                  |     | LDH (U/L)    | 325                   | 561  | 464 | 434  | 237 | 40~400       |
|                  |     | CREA (mg/dL) | 0.4                   | 0.5  | 0.4 | 0.3  | 0.4 | 0.5~1.8      |
|                  | C   | ALT (U/L)    | 53                    | 38   | 24  | 65   | 59  | 10~100       |
|                  |     | ALB (g/dL)   | 3.3                   | 3.1  | 2.9 | 2.8  | 2.7 | 2.3~4.0      |
|                  |     | TBIL (mg/dL) | 0.6                   | 0.6  | 1.1 | 0.1  | 0.1 | 0~0.9        |
|                  |     | BUN (mg/dL)  | 16.48                 | 28   | 19  | 19   | 22  | 7~27         |
|                  |     | ALKP (U/L)   | 65                    | 64   | 50  | 68   | 79  | 23~212       |
|                  |     | LDH (U/L)    | 192                   | 807  | 971 | 428  | 201 | 40~400       |
|                  |     | CREA (mg/dL) | 0.6                   | 0.4  | 0.3 | 0.3  | 0.4 | 0.5~1.8      |
| MERS-CoV         | A   | ALT (U/L)    | 48                    | 11   | 55  | 49   | 55  | 10~100       |
|                  |     | ALB (g/dL)   | 3.3                   | 3.4  | 2.9 | 3.3  | 3   | 2.3~4.0      |
|                  |     | TBIL (mg/dL) | 0.06                  | 1.4  | 0.2 | 0.6  | 0.2 | 0~0.9        |
|                  |     | BUN (mg/dL)  | 13.45                 | 24   | 17  | 13   | 20  | 7~27         |
|                  |     | ALKP (U/L)   | 73                    | 140  | 246 | 133  | 206 | 23~212       |
|                  |     | LDH (U/L)    | 231                   | 788  | 346 | 705  | 389 | 40~400       |
|                  |     | CREA (mg/dL) | 0.6                   | 0.5  | 0.5 | 0.4  | 0.4 | 0.5~1.8      |
|                  | B   | ALT (U/L)    | 42                    | 54   | 92  | 64   | 65  | 10~100       |
|                  |     | ALB (g/dL)   | 3.4                   | 3.7  | 3   | 3    | 2.9 | 2.3~4.0      |
|                  |     | TBIL (mg/dL) | 0.1                   | 2    | 0.5 | 0.2  | 0.1 | 0~0.9        |
|                  |     | BUN (mg/dL)  | 9.82                  | 22   | 12  | 17   | 13  | 7~27         |
|                  |     | ALKP (U/L)   | 78                    | 59   | 63  | 66   | 76  | 23~212       |
|                  |     | LDH (U/L)    | 186                   | 1583 | 567 | 669  | 403 | 40~400       |
|                  |     | CREA (mg/dL) | 0.6                   | 0.5  | 0.6 | 0.6  | 0.6 | 0.5~1.8      |
|                  | C   | ALT (U/L)    | 29                    | 41   | 67  | 59   | 64  | 10~100       |
|                  |     | ALB (g/dL)   | 3.2                   | 3.5  | 2.9 | 2.9  | 2.9 | 2.3~4.0      |
|                  |     | TBIL (mg/dL) | 0.07                  | 1.5  | 0.1 | 0.1  | 0.1 | 0~0.9        |
|                  |     | BUN (mg/dL)  | 11.57                 | 22   | 9   | 11   | 19  | 7~27         |
|                  |     | ALKP (U/L)   | 114                   | 78   | 117 | 142  | 131 | 23~212       |
|                  |     | LDH (U/L)    | 199                   | 1335 | 423 | 340  | 312 | 40~400       |
|                  |     | CREA (mg/dL) | 0.6                   | 0.4  | 0.3 | 0.3  | 0.4 | 0.5~1.8      |
| Negative control |     | ALT (U/L)    | 67                    | 72   | 87  | 75   | 64  | 10~100       |
|                  |     | ALB (g/dL)   | 2.8                   | 2.9  | 2.7 | 2.8  | 2.8 | 2.3~4.0      |
|                  |     | TBIL (mg/dL) | 0.1                   | 0.1  | 0.1 | 0.1  | 0.1 | 0~0.9        |
|                  |     | BUN (mg/dL)  | 27                    | 16   | 18  | 17   | 16  | 7~27         |
|                  |     | ALKP (U/L)   | 85                    | 73   | 78  | 76   | 71  | 23~212       |
|                  |     | LDH (U/L)    | 210                   | 325  | 231 | 186  | 358 | 40~400       |
|                  |     | CREA (mg/dL) | 0.4                   | 0.5  | 0.5 | 0.6  | 0.6 | 0.5~1.8      |
