# Supplementary material for: Susceptibility to SARS-CoV-2 and MERS-CoV in Beagle Dogs
Source: MDPI journal article supplement (doi:10.3390/ani13040624), 2023-02-10
Supplement: s1 [file s1]

| Hematological test |     |                 |                       |      |      |      |      |              |
|--------------------|-----|-----------------|-----------------------|------|------|------|------|--------------|
| Group              | Dog | Parameter       | days-post-inoculation |      |      |      |      | Normal range |
|                    |     |                 | 0                     | 3    | 5    | 6    | 7    |              |
| SARS-CoV-2         | A   | WBC (x10^3/μl)  | 9.7                   | 12.5 | 12.2 | 7.7  | 9    | 6.0~17.0     |
|                    |     | LYM (x10^3/μl)  | 1.9                   | 4.2  | 4.4  | 2.7  | 2.8  | 0.9~5.0      |
|                    |     | MONO (x10^3/μl) | 0.3                   | 1    | 1.2  | 0.8  | 1    | 0.3~1.5      |
|                    |     | GRAN (x10^3/μl) | 7.1                   | 7.3  | 6.6  | 4.2  | 5.2  | 3.5~12.0     |
|                    |     | HGB (g/dL)      | 16.1                  | 19.5 | 16.4 | 14.5 | 14.5 | 12.0~18.0    |
|                    |     | HCT (%)         | 49.4                  | 52.3 | 44.7 | 38.2 | 39.2 | 37.0~55.0    |
|                    |     | RBC (x10^6/μl)  | 6.98                  | 7.84 | 6.75 | 5.92 | 5.98 | 5.50~8.50    |
|                    |     | PLT (x10^3/μl)  | 288                   | 203  | 296  | 66   | 28   | 200~500      |
|                    | B   | WBC (x10^3/μl)  | 9.8                   | 11.8 | 10.2 | 9.6  | 9.7  | 6.0~17.0     |
|                    |     | LYM (x10^3/μl)  | 2.2                   | 5.2  | 3.7  | 3.7  | 3.5  | 0.9~5.0      |
|                    |     | MONO (x10^3/μl) | 0.3                   | 1.7  | 1.4  | 1.4  | 1.6  | 0.3~1.5      |
|                    |     | GRAN (x10^3/μl) | 7.2                   | 4.9  | 5.1  | 4.5  | 4.6  | 3.5~12.0     |
|                    |     | HGB (g/dL)      | 16                    | 19.8 | 15.4 | 15.3 | 15.5 | 12.0~18.0    |
|                    |     | HCT (%)         | 47.4                  | 51.6 | 41.3 | 39.4 | 41.1 | 37.0~55.0    |
|                    |     | RBC (x10^6/μl)  | 7                     | 8.54 | 6.85 | 6.69 | 6.83 | 5.50~8.50    |
|                    |     | PLT (x10^3/μl)  | 413                   | 165  | 76   | 152  | 206  | 200~500      |
|                    | C   | WBC (x10^3/μl)  | 9.4                   | 11   | 14   | 11.1 | 11.7 | 6.0~17.0     |
|                    |     | LYM (x10^3/μl)  | 1.9                   | 2.9  | 5.3  | 3.3  | 2.8  | 0.9~5.0      |
|                    |     | MONO (x10^3/μl) | 0.3                   | 1.5  | 2    | 1.6  | 1.2  | 0.3~1.5      |
|                    |     | GRAN (x10^3/μl) | 7.5                   | 6.6  | 6.7  | 6.2  | 7.7  | 3.5~12.0     |
|                    |     | HGB (g/dL)      | 14.3                  | 15.6 | 14.8 | 14.6 | 13.6 | 12.0~18.0    |
|                    |     | HCT (%)         | 42.4                  | 41.1 | 38.6 | 38.5 | 36.6 | 37.0~55.0    |
|                    |     | RBC (x10^6/μl)  | 6.59                  | 6.81 | 6.49 | 6.48 | 6.03 | 5.50~8.50    |
|                    |     | PLT (x10^3/μl)  | 228                   | 330  | 240  | 325  | 345  | 200~500      |
| MERS               | A   | WBC (x10^3/μl)  | 9                     | 13   | 11.8 | 15.3 | 11.6 | 6.0~17.0     |
|                    |     | LYM (x10^3/μl)  | 1.7                   | 4.6  | 4.7  | 3.8  | 2.9  | 0.9~5.0      |
|                    |     | MONO (x10^3/μl) | 0.3                   | 1.5  | 1.3  | 1.5  | 0.9  | 0.3~1.5      |
|                    |     | GRAN (x10^3/μl) | 6.8                   | 6.9  | 5.8  | 10   | 7.8  | 3.5~12.0     |
|                    |     | HGB (g/dL)      | 15.3                  | 17.3 | 16.2 | 17.3 | 13.5 | 12.0~18.0    |
|                    |     | HCT (%)         | 45.3                  | 46.9 | 43.5 | 46   | 36.2 | 37.0~55.0    |
|                    |     | RBC (x10^6/μl)  | 6.47                  | 7.16 | 6.67 | 7.13 | 5.62 | 5.50~8.50    |
|                    |     | PLT (x10^3/μl)  | 221                   | 91   | 254  | 75   | 222  | 200~500      |
|                    | B   | WBC (x10^3/μl)  | 9                     | 12.4 | 8.6  | 10.2 | 10.8 | 6.0~17.0     |
|                    |     | LYM (x10^3/μl)  | 2                     | 4.8  | 3.3  | 3.1  | 2.6  | 0.9~5.0      |
|                    |     | MONO (x10^3/μl) | 0.4                   | 1.4  | 1.3  | 1.4  | 1.1  | 0.3~1.5      |
|                    |     | GRAN (x10^3/μl) | 6.5                   | 6.2  | 4    | 5.7  | 7.1  | 3.5~12.0     |
|                    |     | HGB (g/dL)      | 15.5                  | 17.4 | 14.7 | 13.7 | 13.9 | 12.0~18.0    |
|                    |     | HCT (%)         | 46.3                  | 45.5 | 39.7 | 36.5 | 36.8 | 37.0~55.0    |
|                    |     | RBC (x10^6/μl)  | 6.58                  | 6.95 | 6.11 | 5.66 | 5.7  | 5.50~8.50    |
|                    |     | PLT (x10^3/μl)  | 402                   | 150  | 276  | 202  | 324  | 200~500      |
|                    | C   | WBC (x10^3/μl)  | 9.9                   | 14.1 | 10.5 | 11.8 | 14   | 6.0~17.0     |
|                    |     | LYM (x10^3/μl)  | 4.7                   | 4.2  | 4.1  | 3.7  | 3.7  | 0.9~5.0      |
|                    |     | MONO (x10^3/μl) | 0.3                   | 1.9  | 1.3  | 1.5  | 1.3  | 0.3~1.5      |
|                    |     | GRAN (x10^3/μl) | 4.7                   | 8    | 5.1  | 6.6  | 9    | 3.5~12.0     |
|                    |     | HGB (g/dL)      | 15                    | 16.2 | 14.7 | 15.2 | 15.1 | 12.0~18.0    |
|                    |     | HCT (%)         | 45.5                  | 44.3 | 40   | 40   | 40.9 | 37.0~55.0    |
|                    |     | RBC (x10^6/μl)  | 6.78                  | 6.95 | 6.47 | 6.52 | 6.56 | 5.50~8.50    |
|                    |     | PLT (x10^3/μl)  | 323                   | 98   | 262  | 311  | 314  | 200~500      |
| Negative control   |     | WBC (x10^3/μl)  | 10.2                  | 9.1  | 11   | 12.2 | 12.8 | 6.0~17.0     |
|                    |     | LYM (x10^3/μl)  | 3.5                   | 4.4  | 3.2  | 4.4  | 4    | 0.9~5.0      |
|                    |     | MONO (x10^3/μl) | 1.3                   | 1.2  | 1.4  | 0.8  | 1.2  | 0.3~1.5      |
|                    |     | GRAN (x10^3/μl) | 5.4                   | 3.5  | 6.4  | 7    | 7.6  | 3.5~12.0     |
|                    |     | HGB (g/dL)      | 16.6                  | 16.1 | 15.3 | 17.3 | 15.2 | 12.0~18.0    |
|                    |     | HCT (%)         | 44                    | 43.2 | 42.8 | 46.8 | 39.3 | 37.0~55.0    |
|                    |     | RBC (x10^6/μl)  | 6.89                  | 6.95 | 6.6  | 7.33 | 6.36 | 5.50~8.50    |
|                    |     | PLT (x10^3/μl)  | 355                   | 342  | 371  | 391  | 367  | 200~500      |
