# Supplementary material for: Susceptibility to SARS-CoV-2 and MERS-CoV in Beagle Dogs
Source: MDPI journal article supplement (doi:10.3390/ani13040624), 2023-02-10
Supplement: s1 [file s1]

GRAN

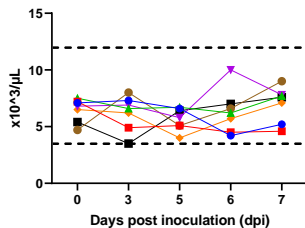

HCT

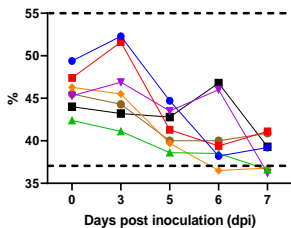

● SARS-CoV-2-A  
 ■ SARS-CoV-2-B  
 ▲ SARS-CoV-2-C  
 ▼ MERS-CoV-A  
 ◆ MERS-CoV-B  
 ● MERS-CoV-C  
 ■ Negative control  
 --- Normal range

HGB

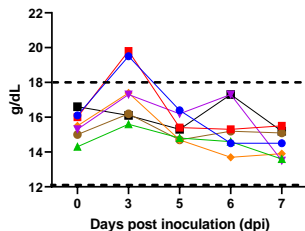

LYM

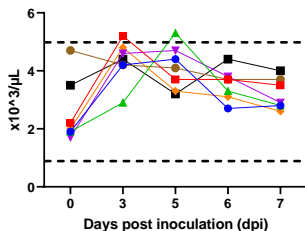

● SARS-CoV-2-A  
 ■ SARS-CoV-2-B  
 ▲ SARS-CoV-2-C  
 ▼ MERS-CoV-A  
 ◆ MERS-CoV-B  
 ● MERS-CoV-C  
 ■ Negative control  
 --- Normal range

MONO

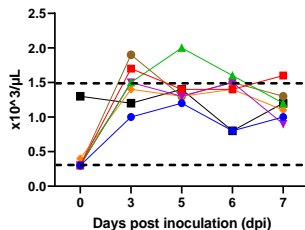

RBC

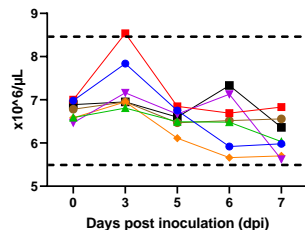

● SARS-CoV-2-A  
 ■ SARS-CoV-2-B  
 ▲ SARS-CoV-2-C  
 ▼ MERS-CoV-A  
 ◆ MERS-CoV-B  
 ● MERS-CoV-C  
 ■ Negative control  
 --- Normal range

WBC

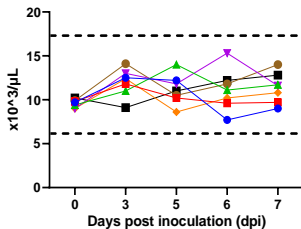

● SARS-CoV-2-A  
 ■ SARS-CoV-2-B  
 ▲ SARS-CoV-2-C  
 ▼ MERS-CoV-A  
 ◆ MERS-CoV-B  
 ● MERS-CoV-C  
 ■ Negative control  
 --- Normal range
