# Supplementary figures and images for: Susceptibility to SARS-CoV-2 and MERS-CoV in Beagle Dogs
Source: MDPI journal article supplement (doi:10.3390/ani13040624), 2023-02-10

ALT

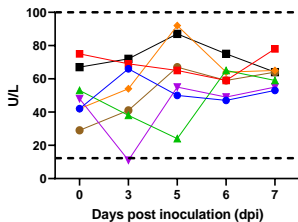

ALB

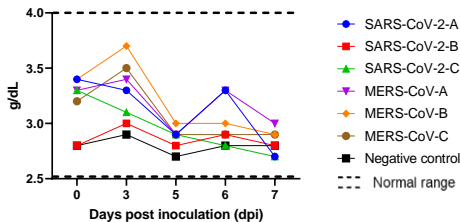

TBIL

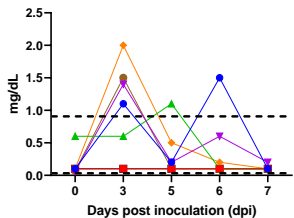

BUN

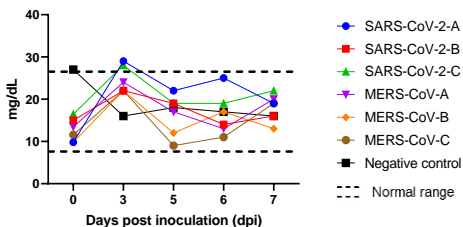

ALP

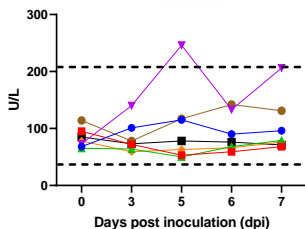

CREA

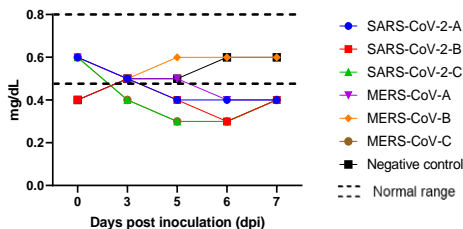

Supplement: s1 [file s1]
